# Supplementary material for: Vibronic spectra of the p-benzoquinone radical anion and cation: a matrix isolation and computational study
Source: Royal Society of Chemistry journal article supplement (doi:10.1039/c3cp53960a), 2013-12-17
Supplement: c3cp53960a.pdf [file c3cp53960a.pdf]

## Supporting Information

### Vibronic Spectra of the *p*-Benzoquinone Radical Anion and Cation: A Matrix Isolation and Computational Study.

Krzysztof Piech, Thomas Bally\*, Takatoshi Ichino and John Stanton\*

#### Contents

|                                                         |    |
|---------------------------------------------------------|----|
| Full quotation of Reference 43 (Gaussian program)       | S1 |
| Cartesian coordinates for PBQ, its cation and its anion | S2 |
| Results of TD-DFT calculations for PBQ <sup>•-</sup>    | S3 |
| Results of TD-DFT calculations for PBQ <sup>•+</sup>    | S3 |

#### Full quotation of Reference 43 (Gaussian program)

M. J. Frisch, G. W. Trucks, H. B. Schlegel, G. E. Scuseria, M. A. Robb, J. R. Cheeseman, G. Scalmani, V. Barone, B. Mennucci, G. A. Petersson, H. Nakatsuji, M. Caricato, X. Li, H. P. Hratchian, A. F. Izmaylov, J. Bloino, G. Zheng, J. L. Sonnenberg, M. Hada, M. Ehara, K. Toyota, R. Fukuda, J. Hasegawa, M. Ishida, T. Nakajima, Y. Honda, O. Kitao, H. Nakai, T. Vreven, J. A. Montgomery, Jr., J. E. Peralta, F. Ogliaro, M. Bearpark, J. J. Heyd, E. Brothers, K. N. Kudin, V. N. Staroverov, T. Keith, R. Kobayashi, J. Normand, K. Raghavachari, A. Rendell, J. C. Burant, S. S. Iyengar, J. Tomasi, M. Cossi, N. Rega, J. M. Millam, M. Klene, J. E. Knox, J. B. Cross, V. Bakken, C. Adamo, J. Jaramillo, R. Gomperts, R. E. Stratmann, O. Yazyev, A. J. Austin, R. Cammi, C. Pomelli, J. W. Ochterski, R. L. Martin, K. Morokuma, V. G. Zakrzewski, G. A. Voth, P. Salvador, J. J. Dannenberg, S. Dapprich, A. D. Daniels, O. Farkas, J. B. Foresman, J. V. Ortiz, J. Cioslowski, and D. J. Fox, Gaussian 09, Revision C.01, Gaussian, Inc., Wallingford CT, 2010.

### B3LYP/6-311+G(2d,p) cartesian coordinates of PBQ

| Center<br>Number | Atomic<br>Number | Coordinates (Angstroms) |           |           |
|------------------|------------------|-------------------------|-----------|-----------|
|                  |                  | X                       | Y         | Z         |
| 1                | 6                | 0.000000                | 0.000000  | 1.438709  |
| 2                | 6                | 0.000000                | 1.267043  | 0.667870  |
| 3                | 6                | 0.000000                | 1.267043  | -0.667870 |
| 4                | 6                | 0.000000                | 0.000000  | -1.438709 |
| 5                | 6                | 0.000000                | -1.267043 | -0.667870 |
| 6                | 6                | 0.000000                | -1.267043 | 0.667870  |
| 7                | 1                | 0.000000                | 2.177069  | 1.256376  |
| 8                | 1                | 0.000000                | 2.177069  | -1.256376 |
| 9                | 1                | 0.000000                | -2.177069 | -1.256376 |
| 10               | 1                | 0.000000                | -2.177069 | 1.256376  |
| 11               | 8                | 0.000000                | 0.000000  | 2.656604  |
| 12               | 8                | 0.000000                | 0.000000  | -2.656604 |

Low freq. -8.4805 -1.7853 -0.0011 -0.0010 -0.0008 8.8918

### B3LYP/6-311+G(2d,p) cartesian coordinates of PBQ<sup>-</sup>

| Center<br>Number | Atomic<br>Number | Coordinates (Angstroms) |           |           |
|------------------|------------------|-------------------------|-----------|-----------|
|                  |                  | X                       | Y         | Z         |
| 1                | 6                | 0.000000                | 0.000000  | 1.465572  |
| 2                | 6                | 0.000000                | 1.219844  | 0.683154  |
| 3                | 6                | 0.000000                | 1.219844  | -0.683154 |
| 4                | 6                | 0.000000                | 0.000000  | -1.465572 |
| 5                | 6                | 0.000000                | -1.219844 | -0.683154 |
| 6                | 6                | 0.000000                | -1.219844 | 0.683154  |
| 7                | 1                | 0.000000                | 2.149490  | 1.246991  |
| 8                | 1                | 0.000000                | 2.149490  | -1.246991 |
| 9                | 1                | 0.000000                | -2.149490 | -1.246991 |
| 10               | 1                | 0.000000                | -2.149490 | 1.246991  |
| 11               | 8                | 0.000000                | 0.000000  | 2.726726  |
| 12               | 8                | 0.000000                | 0.000000  | -2.726726 |

Low freq. -2.6665 0.0006 0.0006 0.0007 8.3816 17.8805

### B3LYP/6-311+G(2d,p) cartesian coordinates of PBQ<sup>+</sup>

| Center<br>Number | Atomic<br>Number | Coordinates (Angstroms) |           |           |
|------------------|------------------|-------------------------|-----------|-----------|
|                  |                  | X                       | Y         | Z         |
| 1                | 6                | 0.000000                | 0.000000  | 1.444523  |
| 2                | 6                | 0.000000                | 1.288339  | 0.658885  |
| 3                | 6                | 0.000000                | 1.288339  | -0.658885 |
| 4                | 6                | 0.000000                | 0.000000  | -1.444523 |
| 5                | 6                | 0.000000                | -1.288339 | -0.658885 |
| 6                | 6                | 0.000000                | -1.288339 | 0.658885  |
| 7                | 1                | 0.000000                | 2.187567  | 1.264322  |
| 8                | 1                | 0.000000                | 2.187567  | -1.264322 |
| 9                | 1                | 0.000000                | -2.187567 | -1.264322 |
| 10               | 1                | 0.000000                | -2.187567 | 1.264322  |
| 11               | 8                | 0.000000                | 0.000000  | 2.642429  |
| 12               | 8                | 0.000000                | 0.000000  | -2.642429 |

Low freq. -10.9031 -4.9197 -0.0006 -0.0005 0.0003 9.1984

### results of TD-DFT calculations on PBQ<sup>-</sup> with B3LYP/6-311+G(2d,p)

Excitation energies and oscillator strengths (SOMO = 29A):  
leading configurations in blue, observed excited states in red

|               |    |            |           |           |          |
|---------------|----|------------|-----------|-----------|----------|
| Excited State | 1: | ?Spin -B1G | 2.2280 eV | 556.48 nm | f=0.0000 |
|               |    | 27B -> 39B | -0.11193  |           |          |
|               |    | 28B -> 29B | 0.99887   |           |          |
| Excited State | 2: | ?Spin -AU  | 2.2476 eV | 551.63 nm | f=0.0000 |
|               |    | 27B -> 29B | 1.00016   |           |          |
|               |    | 28B -> 39B | -0.11287  |           |          |
| Excited State | 3: | ?Spin -B2U | 3.0150 eV | 411.22 nm | f=0.0459 |
|               |    | 29A -> 30A | 0.97326   |           |          |
|               |    | 25B -> 39B | -0.10643  |           |          |
| Excited State | 4: | ?Spin -B1U | 3.0393 eV | 407.94 nm | f=0.0654 |
|               |    | 26A -> 30A | -0.19714  |           |          |
|               |    | 29A -> 35A | 0.50035   |           |          |
|               |    | 29A -> 38A | 0.21502   |           |          |
|               |    | 26B -> 29B | 0.88932   |           |          |
| Excited State | 5: | ?Spin -B2G | 3.2031 eV | 387.07 nm | f=0.0000 |
|               |    | 29A -> 31A | 0.99911   |           |          |
| Excited State | 6: | ?Spin -B3G | 3.2742 eV | 378.68 nm | f=0.0000 |
|               |    | 20A -> 30A | 0.11079   |           |          |
|               |    | 25A -> 30A | -0.20351  |           |          |
|               |    | 26A -> 53A | -0.10759  |           |          |
|               |    | 25B -> 29B | 0.99315   |           |          |
|               |    | 26B -> 32B | 0.14141   |           |          |
| Excited State | 7: | ?Spin -AU  | 3.4264 eV | 361.85 nm | f=0.0000 |
|               |    | 29A -> 32A | 1.00045   |           |          |
| Excited State | 8: | ?Spin -B3U | 3.8870 eV | 318.97 nm | f=0.0004 |
|               |    | 29A -> 33A | 0.99873   |           |          |
| Excited State | 9: | ?Spin -B1U | 4.1731 eV | 297.11 nm | f=0.1409 |
|               |    | 26A -> 30A | 0.59994   |           |          |
|               |    | 29A -> 35A | 0.71760   |           |          |
|               |    | 21B -> 29B | 0.10484   |           |          |
|               |    | 25B -> 32B | -0.31325  |           |          |
|               |    | 26B -> 29B | -0.23579  |           |          |

... followed by forbidden or very weak transition to 6 more states above 250 nm.

### results of TD-DFT calculations on PBQ<sup>+</sup> with B3LYP/6-311+G(2d,p)

|               |    |            |           |            |          |
|---------------|----|------------|-----------|------------|----------|
| Excited State | 1: | ?Spin -B1U | 0.4638 eV | 2673.48 nm | f=0.0159 |
|               |    | 26A -> 29A | -0.41254  |            |          |
|               |    | 25B -> 29B | -0.27819  |            |          |
|               |    | 27B -> 28B | 0.96808   |            |          |

... followed by 12 forbidden transitions above 260 nm and a very strong (and strongly mixed) one at 247 nm (f=0.1651)
